# Supplementary material
Source: Springer Nature journal article supplement (https://www.springermedizin.de/resource/supplementary/13058_2010_2622_MOESM8_ESM.pdf/9702168)
Supplement: MOESM8 [file 9702168]

**Table 1.**

| <b>Response Variable</b> | <b>Predictor Variables</b> | <b><math>\beta</math></b> | <b>p</b> | <b>OR (95% CI)</b>   |
|--------------------------|----------------------------|---------------------------|----------|----------------------|
| p53 $\beta$              | p53 $\gamma$               | 1.01                      | 0.008    | 2.75 (1.29 -5.84)    |
| p53 $\gamma$             | p53m                       | 1.47                      | 0.002    | 4.33 (1.74 -10.78)   |
|                          | p53 $\beta$                | 1.01                      | 0.012    | 2.74 (1.24 -6.04)    |
| p53m                     | p53 $\gamma$               | 1.74                      | 0.002    | 5.70 (1.92 -16.93)   |
|                          | p53 $\beta$                | -0.02                     | 0.970    | 0.98 (0.28 -3.43)    |
|                          | Tumour Grade 3             | 2.85                      | <0.001   | 17.31 (4.02 -74.45)  |
|                          | ER                         | -2.74                     | 0.019    | 0.06 (0.01 -0.64)    |
|                          | PR                         | 2.51                      | 0.032    | 12.27 (1.25 -120.74) |
| ER                       | p53 $\beta$                | -1.10                     | 0.033    | 0.33 (0.12 -0.91)    |
|                          | Tumour Grade 3             | -3.19                     | <0.001   | 0.04 (0.01 -0.19)    |
|                          | PR                         | N/A ‡                     | <0.001   | N/A ‡                |
| PR                       | Tumour Grade 3             | -2.05                     | <0.001   | 0.13 (0.06 -0.30)    |
|                          | ER                         | N/A ‡                     | <0.001   | N/A ‡                |
| Tumour Grade 3           | p53m                       | 2.79                      | <0.001   | 16.22 (4.22 -62.31)  |
|                          | PR                         | -2.17                     | <0.001   | 0.11 (0.05 -0.29)    |
|                          | HER2                       | N/A †                     | <0.001   | N/A †                |
| Lymph Node Status        | Disease Free Survival      | -0.97                     | 0.040    | 0.38 (0.15 -0.96)    |
| Overall Survival         | p53m                       | -1.44                     | 0.017    | 0.24 (0.07 -0.78)    |
|                          | PR                         | 1.48                      | 0.014    | 4.41 (1.34 -14.45)   |
|                          | Tumour Size                | -1.22                     | 0.036    | 0.29 (0.09 -0.93)    |
|                          | p53 $\gamma$               | -0.18                     | 0.783    | 0.83 (0.22 -3.10)    |
|                          | p53 $\beta$                | 1.15                      | 0.082    | 3.17 (0.87 -11.60)   |
| Disease Free Survival    | p53m                       | -1.25                     | 0.013    | 0.29 (0.11 -0.76)    |
|                          | PR                         | 1.26                      | 0.009    | 3.52 (1.37 -9.04)    |
|                          | p53 $\gamma$               | 0.28                      | 0.636    | 1.33 (0.41 -4.30)    |
|                          | p53 $\beta$                | 0.74                      | 0.198    | 2.10 (0.68 -6.47)    |
